# Supplementary material for: Electronic transduction of biocatalytic transformations on nucleic acid-functionalized surfaces
Source: Royal Society of Chemistry journal article supplement (doi:10.1039/b104335h), 2001-01-01
Supplement: b104335h.doc [file b104335h.doc]

**Supplementary Material**

**Experimental:**

*Chemicals and Enzymes*

Oligonucleotides were custom-made (General Biotechnology, Rehovot, Israel). Polynucleotide Kinase, 3'-phosphatase free (E.C. 2.7.1.78, from phage T4 am N81 pse T1 infected *Escherichia coli BB)* (PNK), T4 DNA Ligase (E.C. 6.5.1.1., from *Escherichia coli NM 989* acc. to Murray), and Restriction Endonuclease Dra I (from *Deinococcus radiophilus*) were from Boehringer Mannheim GmbH-Germany. Restriction Endonuclease CfoI, DNA polymerase I, Klenow fragment and all other chemicals were of commercial source (Aldrich or Sigma) and were used as supplied without further purification. Ultrapure water from Elgastat (UHQ) source was used throughout this work.

*Electrode Characterization and Pretreatment*

Gold wire electrodes (0.5 mm diameter, ca. 0.2 cm2 geometrical area, roughness coefficient ca. 1.2-1.5) were used for the electrochemical measurements. To remove any previous organic layer, and to regenerate a base metal surface, the electrodes were treated in a boiling 2 M solution of KOH for 4 h, then rinsed with water, and stored in concentrated sulfuric acid. Immediately before modification, the electrodes were rinsed with water, dried, soaked for 2 minutes in fresh piranha solution (30% H2O2, 70% H2SO4). WARNING: PIRANHA SOLUTION REACTS VIOLENTLY WITH ORGANIC SOLVENTS. The resulting electrode was then rinsed with water, soaked for 10 minutes in concentrated nitric acid, and then rinsed with water once more.

*Microgravimetric measurements*

A QCM analyzer (Fluke 164T multifunction counter, 1.3 GHz, TCXO) linked to a personal computer and a home-made flow cell with a volume of 0.3 mL, for a QCM Seiko electrode was employed for the microgravimetric analyses. Quartz crystals (AT-Cut, 9 MHz, EG&G) sandwiched between two Au-electrodes (area 0.196 cm2, roughness factor 2.5-6) were used. Before modification the Au-quartz crystal electrodes were immersed for 2 minutes in a fresh piranha solution as mentioned in the previous paragraph, the electrode was then rinsed thoroughly in water and dried under argon.

*Electrochemical measurements*

A conventional three-electrode cell, consisting of the modified Au-electrode, a glassy carbon auxiliary electrode isolated by a glass frit, and a saturated calomel electrode (SCE) connected to the working volume with a Luggin capillary, was used for the electrochemical measurements. The cell was positioned in a grounded Faradaic cage. Faradaic impedance measurements were performed using an electrochemical impedance analyzer (EG&G, model 1025) and a potentiostat (EG&G, model 233) connected to a computer (EG&G Software Power Suite 1.03 and 270 for the impedance measurements). All electrochemical measurements were performed in 0.1 M phosphate buffer, pH 7.4 as a background electrolyte solution, and in the presence of 10 mM K3[Fe(CN)6]/K4[Fe(CN)6] (1:1) mixture, as a redox probe. The impedance measurements were performed at a bias potential of 0.17 V vs. SCE using alternating voltage, 10 mV, in a frequency range from 100 MHz to 10 kHz. The impedance spectra were plotted in the form of complex plane diagrams (Nyquist plots).

*Electrode/Au-quartz crystal modifications and biocatalytic reactions*

The electrodes were immersed in the solution of the primer oligonucleotide (**1**), 2x10-5 M, in phosphate buffer saline (PBS), pH=7.4, 0.01 M, room temperature for 2 hours. The (**1**)-modified-electrodes were rinsed with the buffer solution and then incubated with the PNK assay allowing the phosphorilation of the 5' of (**1**), 50 mM of Tris-HCl, 10 mM MgCl2, 1 mM ATP, 20 units of T4-PNK 3'-phosphatase free for 30 minutes at 37C. The total volume of the reaction was 40 L. (1 unit of T4-PNK catalyzes the incorporation of 1 nmol [32P] into acid-precipitable products within 30 minutes at 37C). The ligation was performed by the treatment of the phosphorilated-oligonucleotide-modified-electrodes in a solution of (**2**), 3x10-5 M, with T4 DNA ligase, 10 units. (1 unit of T4 DNA ligase converts 1 nmol [32P] from pyrophosphate into Norit-absorbable material in 20 minutes at 37C). The ligation buffer used for T4 DNA ligase assay contained 50 mM Tris-HCl, 10 mM MgCl2, 1 mM ATP, 30 gmL-1 BSA, pH 7.5 at 37C. The reaction time was 30 minutes at 37C. The reaction volume was 40 L. The reaction was stopped by washing the electrode. The resulting electrode was then allowed to hybridize with (**3**), 2.5x10-5 M in 2xSSC, 37C, 2 hours. (2xSSC is a sodium citrate buffer at pH=7.0). The hybridized double-stranded assemblies on the modified electrodes were used as templates for polymerization, in the presence of dNTP's, 1 mM, 3 units of DNA polymerase I, Klenow fragment, 10 mM MgCl2, 10 mM Tris-HCl, pH=7.5, for 30 minutes at 37C, total volume 50 L. (One unit converts 10 nanomoles of deoxyribonucleoside triphosphates into acid insoluble material). After polymerization the electrode was subjected to an endonuclease, the restriction enzyme Cfo I, 10 units in 10 mM Tris-HCl, 10 mM MgCl2, 1 mM ATP, at pH=7.5 in a total volume of 40 L for 1 hour at 37C. (One unit is the enzyme activity that completely cleaves 1 g DNA in 1 hour at 37C). The enzyme's recognition sequence is 5'GCG/C3'. The electrodes after cleavage were allowed to further ligate with (**4**) and to hybridize with (**3**) under the same conditions for ligation and hybridization that were described.

*Radioactive [-32P] ATP labeling of phosphorilation*

The PNK assay was conducted as described in the previous section. To the 1 mM cold ATP was added 3x10-14 mole of [-32P] ATP with the specific radioactivity of 3 cipmole-1. After each step and prior to each step, the resulting electrodes were placed into a scintillation counter (Cherenkov), to assess the amounts of radioactive labels that participated in the enzymatic reactions. After conduction of the specific scission, the radioactivity was measured again and was found to be significantly reduced. The process was stopped after the scission step.

*A control experiment revealing the endonuclease specific activity.*

A gold electrode that was treated in a similar way as described in the previous paragraph: After modification with (**1**), phosphorilation by PNK, ligation and hybridization under the same conditions, the modified electrode was immersed in a solution that contains an endonuclease Dra I, 10 units, in 10 mM Tris-HCl, 10 mM MgCl2, 1 mM ATP, pH=7.5, total volume at 40 L, for 1 hour at 37C (One unit of Dra I is the enzyme activity that completely cleaves 1 g DNA in 1 hour at 37C). The recognition sequence of Dra I is 5'TTT/AAA3'.

**Figure A:** A histogram corresponding to the frequency changes of a set of three Au/quartz crystals (9 MHz, AT-Cut) that were treated by the sequence of the following transformations: (a) (**1**)-functionalized interface; (b) After ligation of (**2**), 3x10-5 M, with the (**1**)-functionalzed electrode in the presence of ligase, 20 units, 37C, 30 min; (c) After hybridization of the resulting electrode with (**3**), 2.5x10-5 M, 2 hours; (d) After replication of the double-stranded assembly in the presence of dNTP, 1x10-3 M and DNA polymerase, 3 units, 37C for 30 minutes; (e) After scission of the resulting assembly with endonuclease Cfo I, 10 units, 37C, 1 hour; (f) After ligation of the resulting interface with (**4**), 6.5x10-5 M in the presence of ligase, 20 units, 37C, 30 minutes. Each step is depicted by the results originating from three different crystals, I, II and III.
