# Supplementary figures and images for: Electronic transduction of biocatalytic transformations on nucleic acid-functionalized surfaces
Source: Royal Society of Chemistry journal article supplement (doi:10.1039/b104335h), 2001-01-01

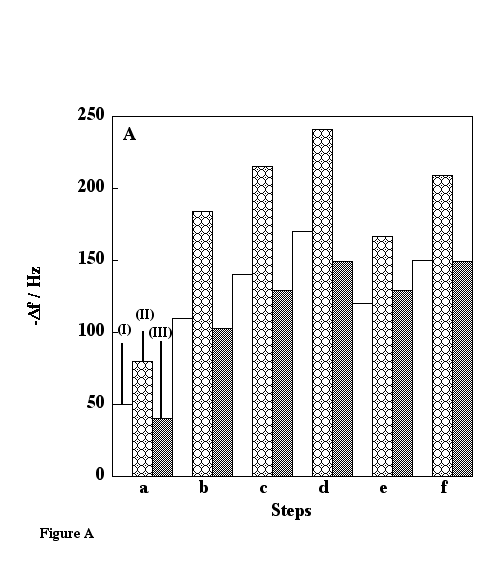

Supplement: b104335hf.doc [file b104335hf.doc]
